# Supplementary material for: A novel and low-toxic peptide DR3penA alleviates pulmonary fibrosis by regulating the MAPK/miR-23b-5p/AQP5 signaling axis
Source: PubMed Central journal article supplement — Acta Pharm Sin B. 2022 Sep 5;13(2):722–38. doi: 10.1016/j.apsb.2022.09.001 (PMC9979266; doi:10.1016/j.apsb.2022.09.001), 2022-09-05
Supplement: mmc1.pdf [file mmc1.pdf]

**Supporting Information for**

**Original article**

**A novel and low-toxic peptide DR3penA alleviates pulmonary fibrosis by regulating the MAPK/miR-23b-5p/AQP5 signaling axis**

Dan Wang<sup>a,b</sup>, Bochuan Deng<sup>a,b</sup>, Lu Cheng<sup>a,b</sup>, Jieru Li<sup>a,b</sup>, Jiao Zhang<sup>a,b</sup>, Xiang Zhang<sup>a,b</sup>, Xiaomin Guo<sup>a,b</sup>, Tiantian Yan<sup>a,b</sup>, Xin Yue<sup>a,b</sup>, Yingying An<sup>a,b</sup>, Bangzhi Zhang<sup>a,b</sup>, Wenle Yang<sup>a,b</sup>, Junqiu Xie<sup>a,b,\*</sup>, Rui Wang<sup>a,b,\*</sup>

*<sup>a</sup>Institute of Materia Medica and Research Unit of Peptide Science, Chinese Academy of Medical Sciences, Peking Union Medical College, Beijing 100050, China*

*<sup>b</sup>Key Laboratory of Preclinical Study for New Drugs of Gansu Province, School of Basic Medical Sciences, Lanzhou University, Lanzhou 730000, China*

\*Corresponding authors. Tel.: +86 931 8915522; fax: +86 931 8911255.

E-mail addresses: xiejq@lzu.edu.cn (Junqiu Xie), wangrui@lzu.edu.cn (Rui Wang).

Received 24 April 2022; received in revised form 19 August 2022; accepted 25 August 2022

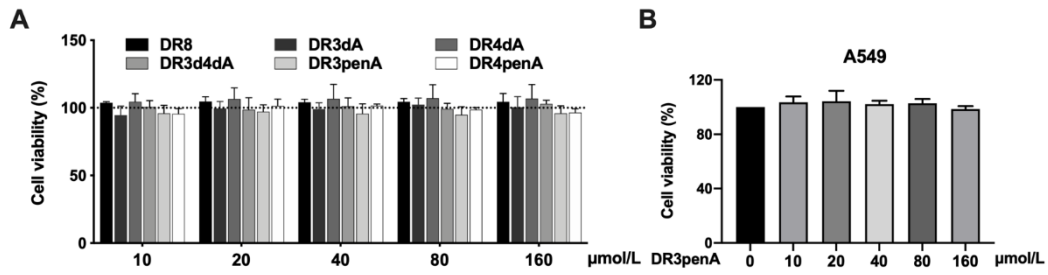

**Figure S1** Viability of NIH3T3 and A549 cells after DR8 and DR8 analogs treatment. (A) Viability of NIH3T3 cells after treatment with DR8 and DR8 analogs at concentrations ranging from 10–160 μmol/L for 24 h. (B) Viability of A549 cells after treatment with DR3penA at a concentration range of 10–160 μmol/L for 48 h. The data are presented as the mean ± SD ( $n = 3$ ).

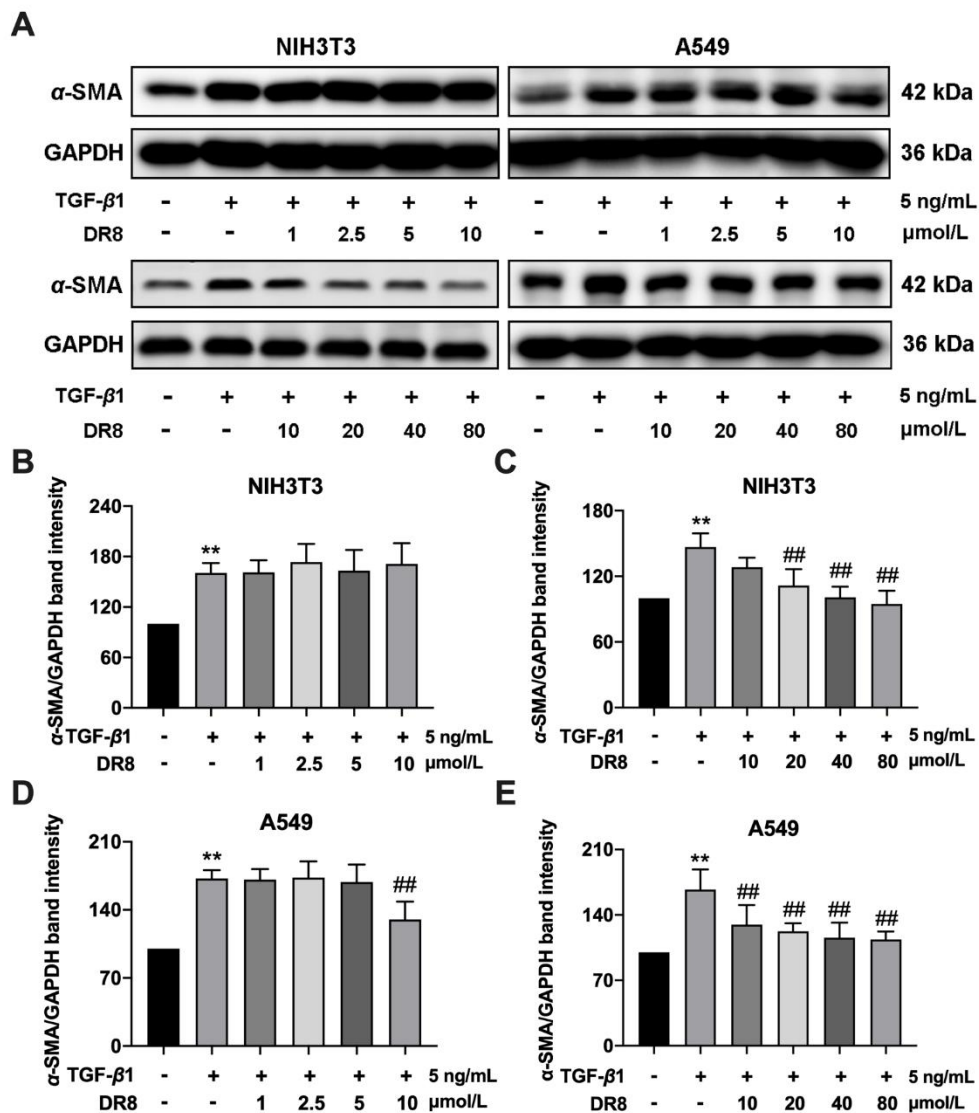

**Figure S2** Activity study of peptide DR8. (A)  $\alpha$ -SMA protein expression after DR8 treatment at concentrations from 1–80  $\mu\text{mol/L}$  in NIH3T3 and A549 cells. (B–E)  $\alpha$ -SMA protein expression bands were normalized to GAPDH expression levels in NIH3T3 and A549 cells. The data are presented as the mean  $\pm$  SD ( $n = 3$ ). \* $P < 0.05$ , \*\* $P < 0.01$  vs. the control group; # $P < 0.05$ , ## $P < 0.01$  vs. the TGF- $\beta$ 1 group.

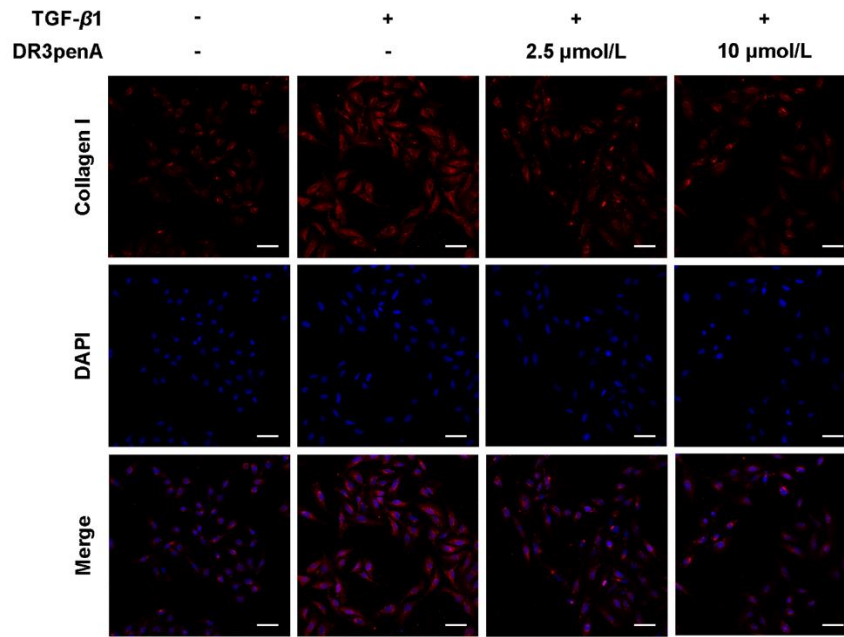

**Figure S3** Immunofluorescence assay of collagen I expression in A549 cells treated with TGF- $\beta$ 1 and/or DR3penA (scale bars, 50  $\mu\text{m}$ ).

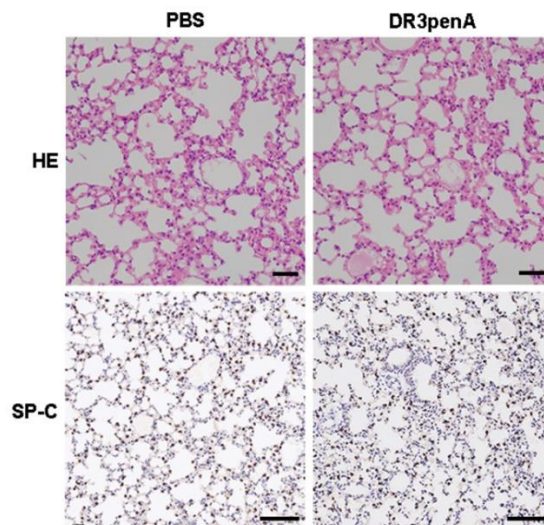

**Figure S4** HE staining and immunohistochemistry of SP-C protein were used to assess lung histopathology in mice treated with PBS or DR3penA at a dose of 2.5 mg/kg (scale bars, 50  $\mu$ m).

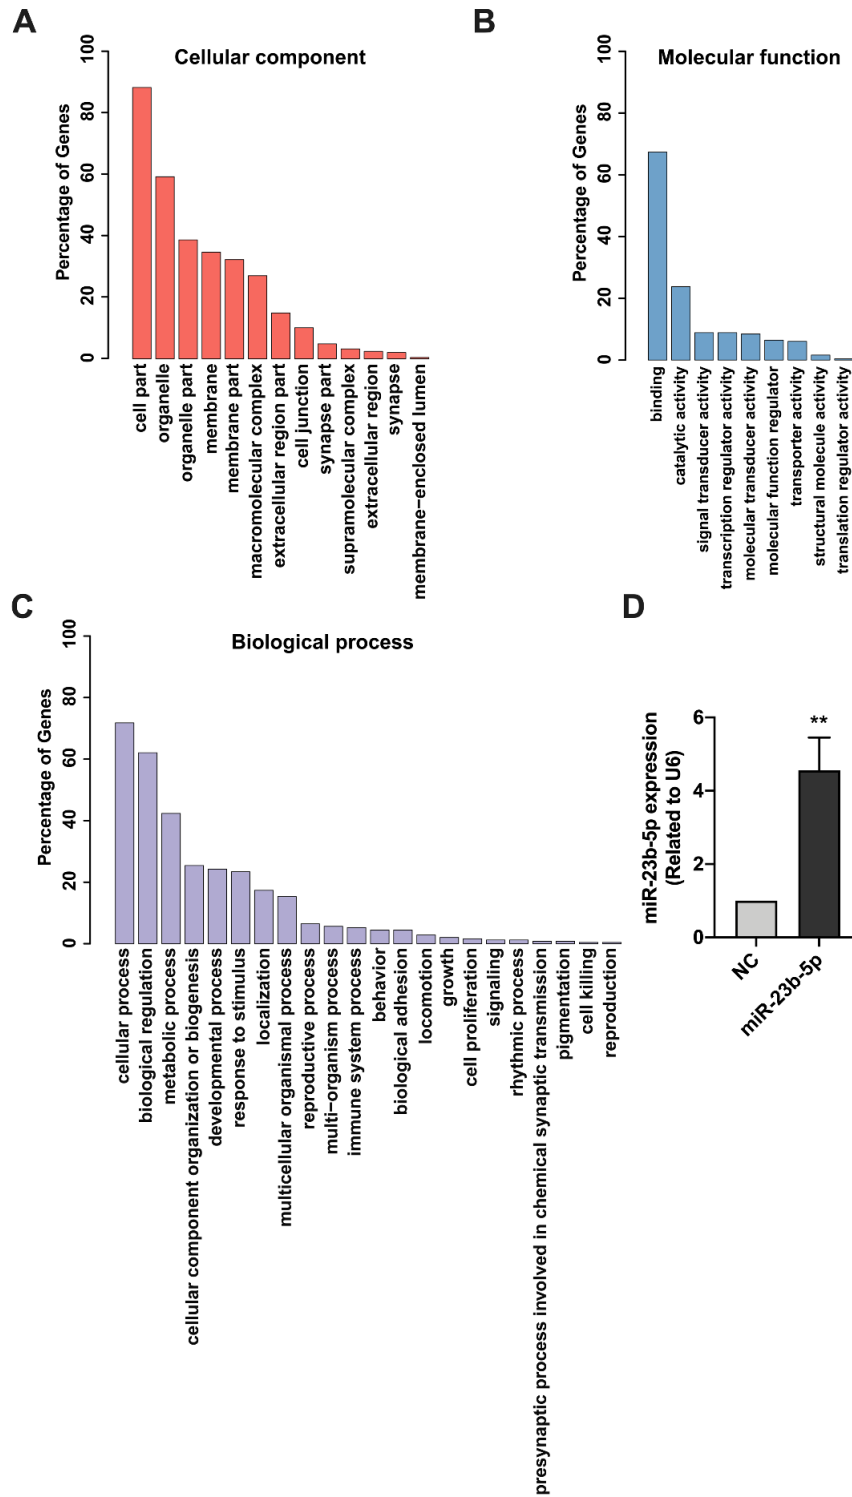

**Figure S5** GO enrichment analysis and miR-23b-5p expression. (A) The functions of genes related to cellular components. (B) The functions of genes involved in molecular function. (C) The functions of genes involved in biological processes. (D) Overexpression efficiency of miR-23b-5p in A549 cells. The data are presented as the mean  $\pm$  SD ( $n = 3$ ).  $**P < 0.01$  vs. NC group.

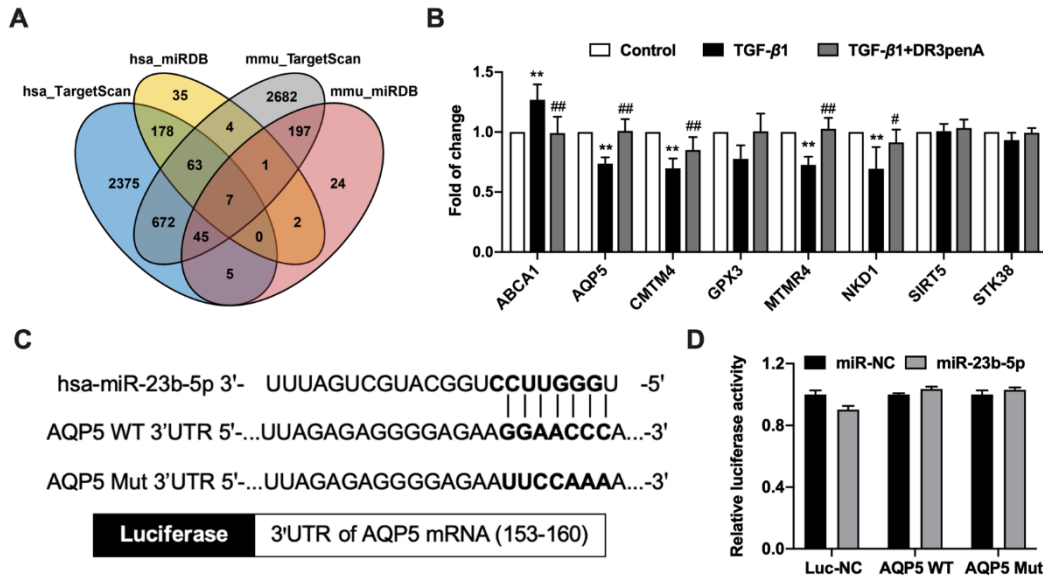

**Figure S6** miR-23b-5p target gene screening and verification via dual-luciferase reporter assays. (A) Venn diagram showing the numbers of target genes of miR-23b-5p predicted by the miRDB and TargetScan databases. (B) The effect of DR3penA on the expression of potential miR-23b-5p target genes in A549 cells induced by TGF- $\beta$ 1. (C) The binding site between miR-23b-5p and AQP5 was predicted by the TargetScan database. (D) Relative luciferase activity was detected to verify the binding between miR-23b-5p and AQP5. The data are presented as the mean  $\pm$  SD ( $n = 3$ ).  $*P < 0.05$ ,  $**P < 0.01$  vs. the control group;  $\#P < 0.05$ ,  $\##P < 0.01$  vs. the TGF- $\beta$ 1 group.

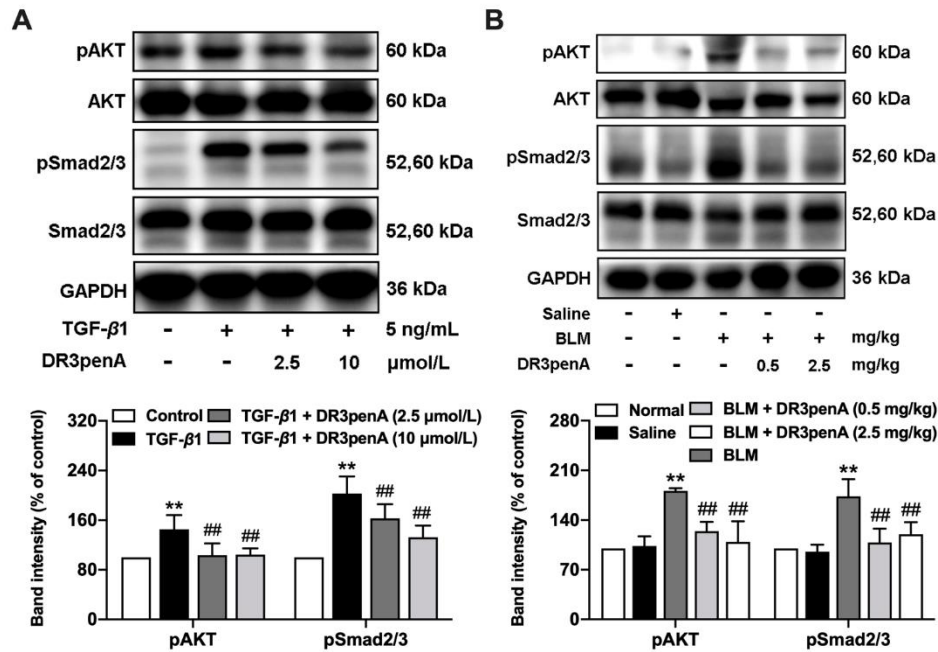

**Figure S7** The effect of DR3penA on the AKT and Smad signaling pathways. Western blotting and statistical analysis of AKT and Smad2/3 phosphorylation in TGF-β1-induced A549 cells (A) and bleomycin-induced mice (B). pAKT and pSmad2/3 levels were normalized to total AKT and Smad2/3 levels, respectively. The data are presented as the mean ± SD ( $n = 4$ ). \* $P < 0.05$ , \*\* $P < 0.01$  vs. the control group or the normal group; # $P < 0.05$ , ## $P < 0.01$  vs. the TGF-β1 group or the BLM group.

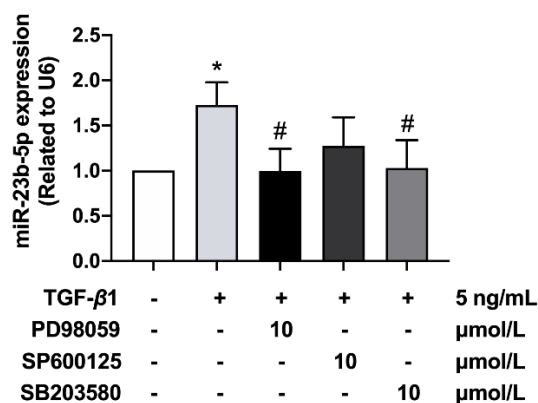

**Figure S8** Real-time qPCR analysis of miR-23b-5p expression in TGF-β1-induced A549 cells pretreated with 10 μmol/L PD98059 (ERK inhibitor), SP600125 (JNK inhibitor) or SB203580 (p38 inhibitor). The data are presented as the mean ± SD ( $n = 3$ ). \* $P < 0.05$ , # $P < 0.05$ .

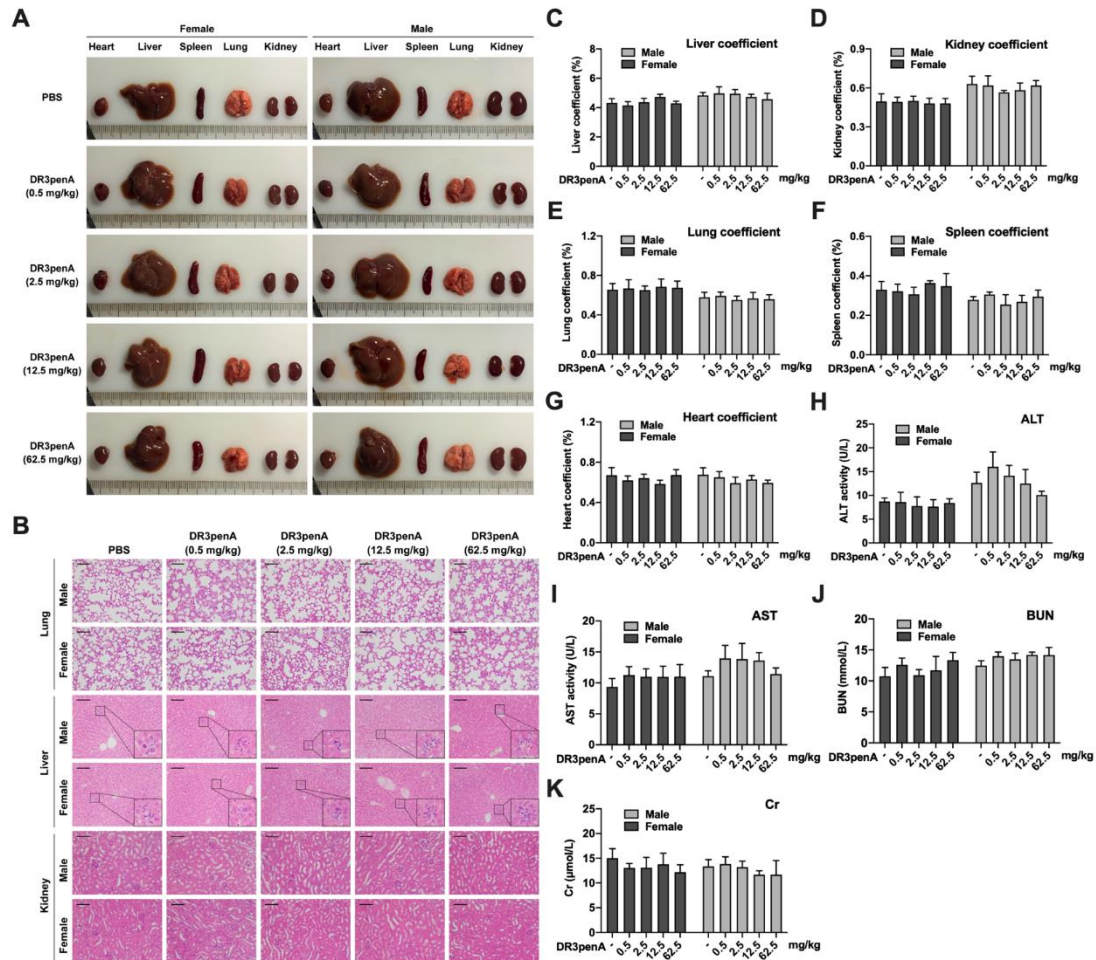

**Figure S9** Acute toxicity evaluation of DR3penA at a dose of 0.5–62.5 mg/kg. (A) Gross analyses of hearts, livers, spleens, lungs and kidneys after DR3penA administration. (B) HE staining of livers, kidneys and lungs after DR3penA administration (scale bars, 100  $\mu$ m). Liver (C), kidney (D), lung (E), spleen (F) and heart (G) coefficients in mice after DR3penA administration. ALT activity (H), AST activity (I), BUN level (J) and Cr level (K) in mice after DR3penA administration. The data are presented as the mean  $\pm$  SD ( $n = 5$ ).

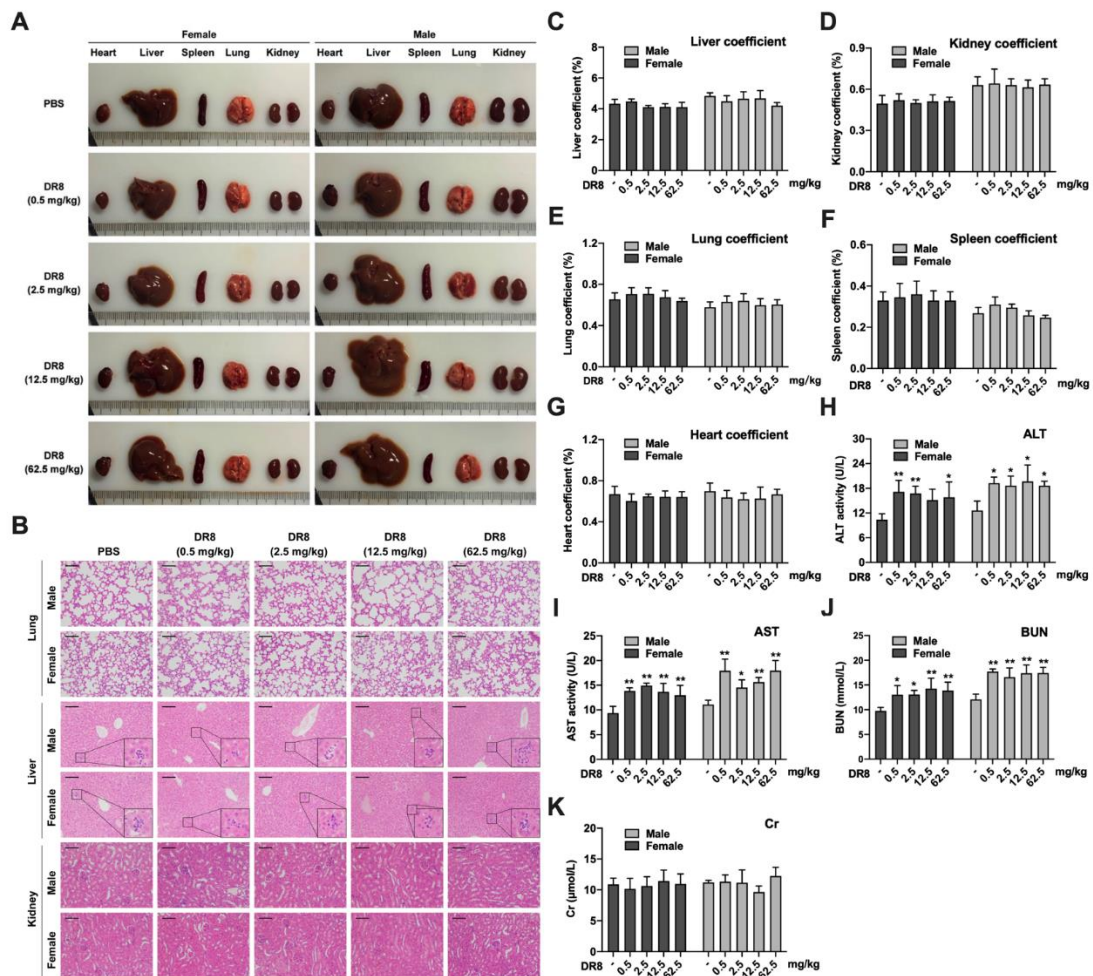

**Figure S10** Acute toxicity evaluation of DR8 at a dose of 0.5–62.5 mg/kg. (A) Gross analyses of hearts, livers, spleens, lungs and kidneys after DR8 administration. (B) HE staining of livers, kidneys and lungs after DR8 administration (scale bars, 100  $\mu$ m). Liver (C), kidney (D), lung (E), spleen (F) and heart (G) coefficients in mice after DR8 administration. ALT activity (H), AST activity (I), BUN level (J) and Cr level (K) in mice after DR8 administration. The data are presented as the mean  $\pm$  SD. \* $P$  < 0.05, \*\* $P$  < 0.01 vs. the control group. The data are presented as the mean  $\pm$  SD ( $n$  = 5).



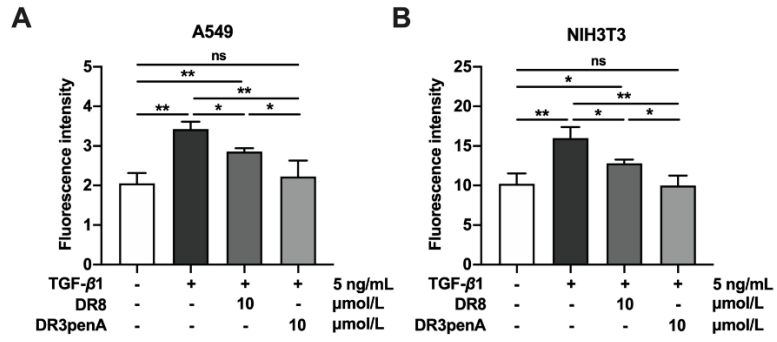

**Figure S11** Antioxidant activity of DR8 and DR3penA. ROS levels were detected with DCFH-DA in TGF- $\beta$ 1-induced A549 cells (A) and NIH3T3 cells (B) after DR8 and DR3penA treatment. The data are presented as the mean  $\pm$  SD ( $n = 4$ ). \* $P < 0.05$ , \*\* $P < 0.01$ .

### Mass Spectrum SmartFormula Report

|                              |                                         |                       |                      |                  |           |
|------------------------------|-----------------------------------------|-----------------------|----------------------|------------------|-----------|
| <b>Analysis Info</b>         |                                         | Acquisition Date      | 5/21/2021 7:07:01 PM |                  |           |
| Analysis Name                | D:\Data\202105\20210521\dengbochuan25.d | Operator              | BDAL@DE              |                  |           |
| Method                       | POS_TuneWide_POS_20170925.m             | Instrument / Ser#     | maXis 4G 20204       |                  |           |
| Sample Name                  | < No Sample >                           | Comment               |                      |                  |           |
| <b>Acquisition Parameter</b> |                                         |                       |                      |                  |           |
| Source Type                  | ESI                                     | Ion Polarity          | Positive             | Set Nebulizer    | 0.3 Bar   |
| Focus                        | Not active                              | Set Capillary         | 4500 V               | Set Dry Heater   | 180 °C    |
| Scan Begin                   | 280 m/z                                 | Set End Plate Offset  | -500 V               | Set Dry Gas      | 4.0 l/min |
| Scan End                     | 2900 m/z                                | Set Collision Cell RF | 1500.0 Vpp           | Set Divert Valve | Source    |

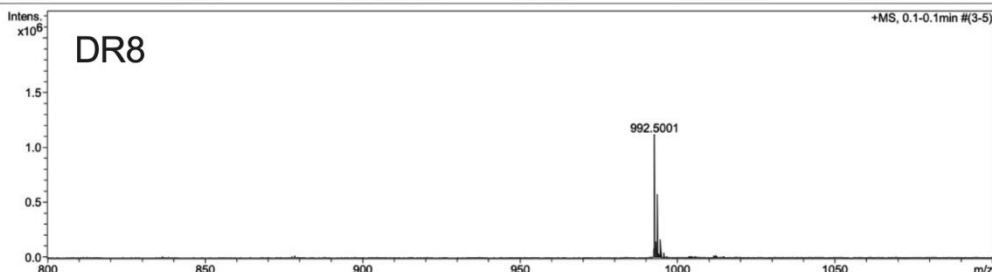

| Meas. m/z | # | Formula             | Score  | m/z      | err [mDa] | err [ppm] | mSigma | rdb  | e <sup>-</sup> Conf | N-Rule |
|-----------|---|---------------------|--------|----------|-----------|-----------|--------|------|---------------------|--------|
| 992.5001  | 1 | C 40 H 66 N 17 O 13 | 100.00 | 992.5021 | 2.0       | 2.0       | 5.4    | 16.5 | even                | ok     |

### Mass Spectrum SmartFormula Report

|                              |                                         |                       |                      |                  |           |
|------------------------------|-----------------------------------------|-----------------------|----------------------|------------------|-----------|
| <b>Analysis Info</b>         |                                         | Acquisition Date      | 5/21/2021 7:01:22 PM |                  |           |
| Analysis Name                | D:\Data\202105\20210521\dengbochuan19.d | Operator              | BDAL@DE              |                  |           |
| Method                       | POS_TuneWide_POS_20170925.m             | Instrument / Ser#     | maXis 4G 20204       |                  |           |
| Sample Name                  | < No Sample >                           | Comment               |                      |                  |           |
| <b>Acquisition Parameter</b> |                                         |                       |                      |                  |           |
| Source Type                  | ESI                                     | Ion Polarity          | Positive             | Set Nebulizer    | 0.3 Bar   |
| Focus                        | Not active                              | Set Capillary         | 4500 V               | Set Dry Heater   | 180 °C    |
| Scan Begin                   | 280 m/z                                 | Set End Plate Offset  | -500 V               | Set Dry Gas      | 4.0 l/min |
| Scan End                     | 2900 m/z                                | Set Collision Cell RF | 1500.0 Vpp           | Set Divert Valve | Source    |

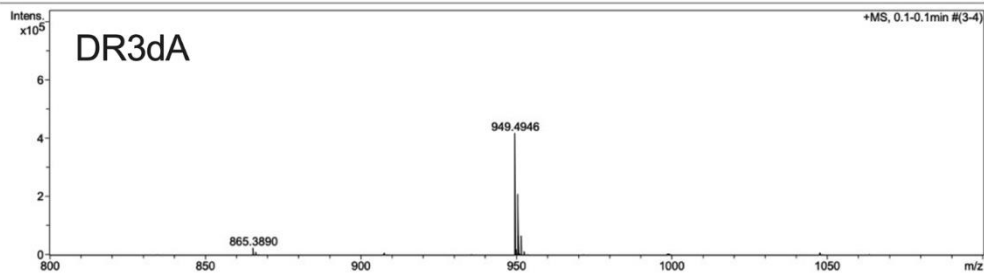

| Meas. m/z | # | Formula             | Score  | m/z      | err [mDa] | err [ppm] | mSigma | rdb  | e <sup>-</sup> Conf | N-Rule |
|-----------|---|---------------------|--------|----------|-----------|-----------|--------|------|---------------------|--------|
| 949.4946  | 1 | C 39 H 65 N 16 O 12 | 100.00 | 949.4962 | 1.7       | 1.8       | 9.9    | 15.5 | even                | ok     |

### Mass Spectrum SmartFormula Report

|                              |                                         |                       |                      |                  |           |
|------------------------------|-----------------------------------------|-----------------------|----------------------|------------------|-----------|
| <b>Analysis Info</b>         |                                         | Acquisition Date      | 5/21/2021 7:02:10 PM |                  |           |
| Analysis Name                | D:\Data\202105\20210521\dengbochuan20.d | Operator              | BDAL@DE              |                  |           |
| Method                       | POS_TuneWide_POS_20170925.m             | Instrument / Ser#     | maXis 4G 20204       |                  |           |
| Sample Name                  | < No Sample >                           | Comment               |                      |                  |           |
| <b>Acquisition Parameter</b> |                                         |                       |                      |                  |           |
| Source Type                  | ESI                                     | Ion Polarity          | Positive             | Set Nebulizer    | 0.3 Bar   |
| Focus                        | Not active                              | Set Capillary         | 4500 V               | Set Dry Heater   | 180 °C    |
| Scan Begin                   | 280 m/z                                 | Set End Plate Offset  | -500 V               | Set Dry Gas      | 4.0 l/min |
| Scan End                     | 2900 m/z                                | Set Collision Cell RF | 1500.0 Vpp           | Set Divert Valve | Source    |

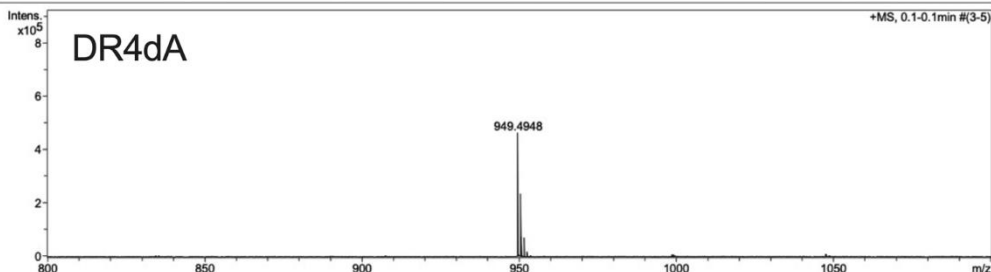

| Meas. m/z | # | Formula             | Score  | m/z      | err [mDa] | err [ppm] | mSigma | rdb  | e <sup>-</sup> Conf | N-Rule |
|-----------|---|---------------------|--------|----------|-----------|-----------|--------|------|---------------------|--------|
| 949.4948  | 1 | C 39 H 65 N 16 O 12 | 100.00 | 949.4962 | 1.4       | 1.5       | 10.6   | 15.5 | even                | ok     |

Figure S12 (continued):

**Mass Spectrum SmartFormula Report**

|                      |                                        |                   |                      |
|----------------------|----------------------------------------|-------------------|----------------------|
| <b>Analysis Info</b> |                                        | Acquisition Date  | 5/21/2021 7:02:56 PM |
| Analysis Name        | D:\Data\202105\20210521dengbochuan21.d | Operator          | BDAL@DE              |
| Method               | POS_TuneWide_POS_20170925.m            | Instrument / Ser# | maXis 4G 20204       |
| Sample Name          | < No Sample >                          |                   |                      |
| Comment              |                                        |                   |                      |

|                              |            |                       |            |                  |           |
|------------------------------|------------|-----------------------|------------|------------------|-----------|
| <b>Acquisition Parameter</b> |            | Ion Polarity          | Positive   | Set Nebulizer    | 0.3 Bar   |
| Source Type                  | ESI        | Set Capillary         | 4500 V     | Set Dry Heater   | 180 °C    |
| Focus                        | Not active | Set End Plate Offset  | -500 V     | Set Dry Gas      | 4.0 l/min |
| Scan Begin                   | 280 m/z    | Set Collision Cell RF | 1500.0 Vpp | Set Divert Valve | Source    |
| Scan End                     | 2900 m/z   |                       |            |                  |           |

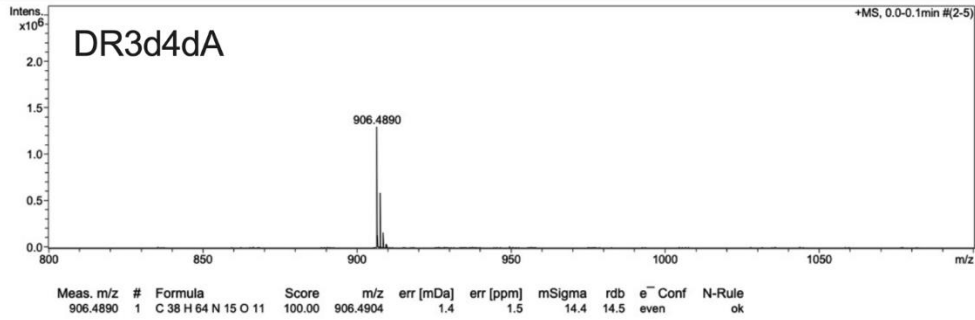

**Mass Spectrum SmartFormula Report**

|                      |                                        |                   |                      |
|----------------------|----------------------------------------|-------------------|----------------------|
| <b>Analysis Info</b> |                                        | Acquisition Date  | 5/21/2021 7:03:46 PM |
| Analysis Name        | D:\Data\202105\20210521dengbochuan22.d | Operator          | BDAL@DE              |
| Method               | POS_TuneWide_POS_20170925.m            | Instrument / Ser# | maXis 4G 20204       |
| Sample Name          | < No Sample >                          |                   |                      |
| Comment              |                                        |                   |                      |

|                              |            |                       |            |                  |           |
|------------------------------|------------|-----------------------|------------|------------------|-----------|
| <b>Acquisition Parameter</b> |            | Ion Polarity          | Positive   | Set Nebulizer    | 0.3 Bar   |
| Source Type                  | ESI        | Set Capillary         | 4500 V     | Set Dry Heater   | 180 °C    |
| Focus                        | Not active | Set End Plate Offset  | -500 V     | Set Dry Gas      | 4.0 l/min |
| Scan Begin                   | 280 m/z    | Set Collision Cell RF | 1500.0 Vpp | Set Divert Valve | Source    |
| Scan End                     | 2900 m/z   |                       |            |                  |           |

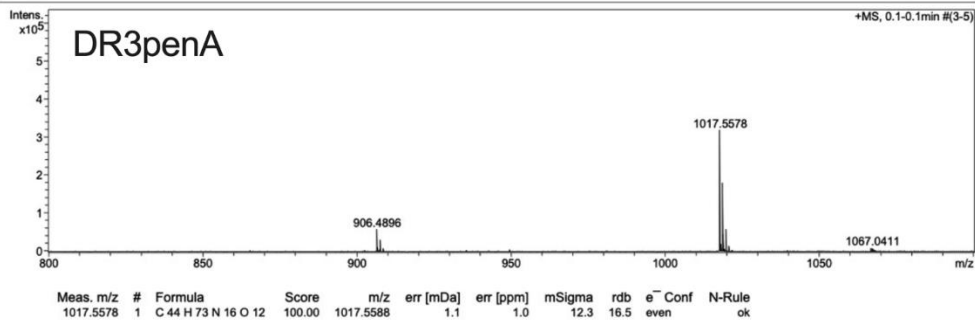

**Mass Spectrum SmartFormula Report**

|                      |                                        |                   |                      |
|----------------------|----------------------------------------|-------------------|----------------------|
| <b>Analysis Info</b> |                                        | Acquisition Date  | 5/21/2021 7:05:06 PM |
| Analysis Name        | D:\Data\202105\20210521dengbochuan23.d | Operator          | BDAL@DE              |
| Method               | POS_TuneWide_POS_20170925.m            | Instrument / Ser# | maXis 4G 20204       |
| Sample Name          | < No Sample >                          |                   |                      |
| Comment              |                                        |                   |                      |

|                              |            |                       |            |                  |           |
|------------------------------|------------|-----------------------|------------|------------------|-----------|
| <b>Acquisition Parameter</b> |            | Ion Polarity          | Positive   | Set Nebulizer    | 0.3 Bar   |
| Source Type                  | ESI        | Set Capillary         | 4500 V     | Set Dry Heater   | 180 °C    |
| Focus                        | Not active | Set End Plate Offset  | -500 V     | Set Dry Gas      | 4.0 l/min |
| Scan Begin                   | 280 m/z    | Set Collision Cell RF | 1500.0 Vpp | Set Divert Valve | Source    |
| Scan End                     | 2900 m/z   |                       |            |                  |           |

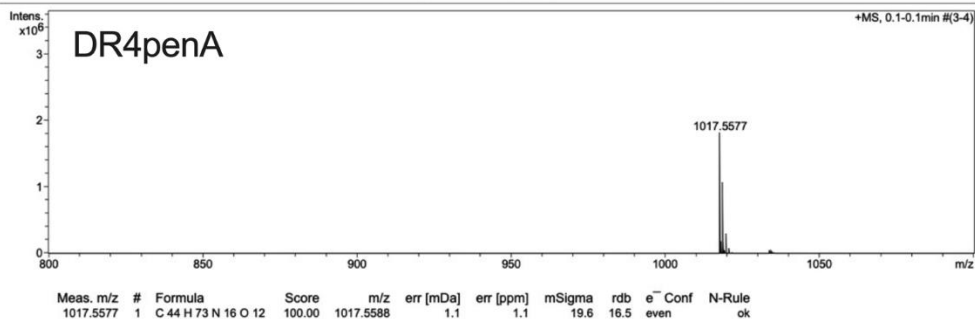

**Figure S12** Identification of peptide DR8 and DR8 analogs with mass spectrometry.

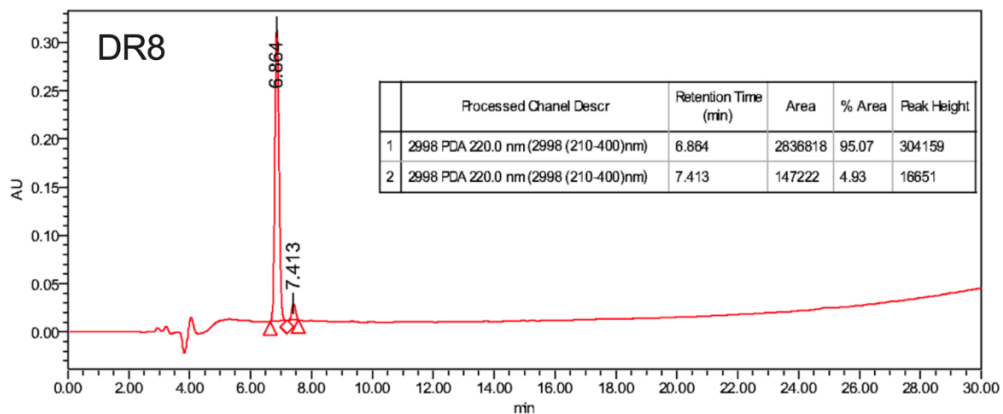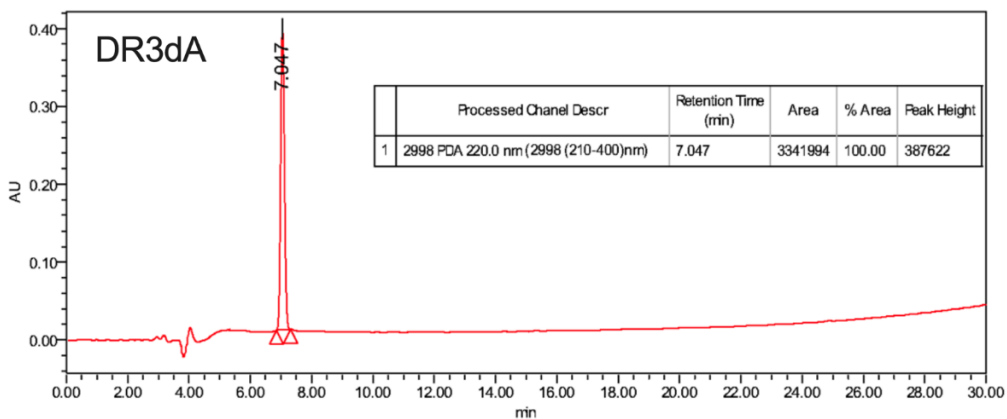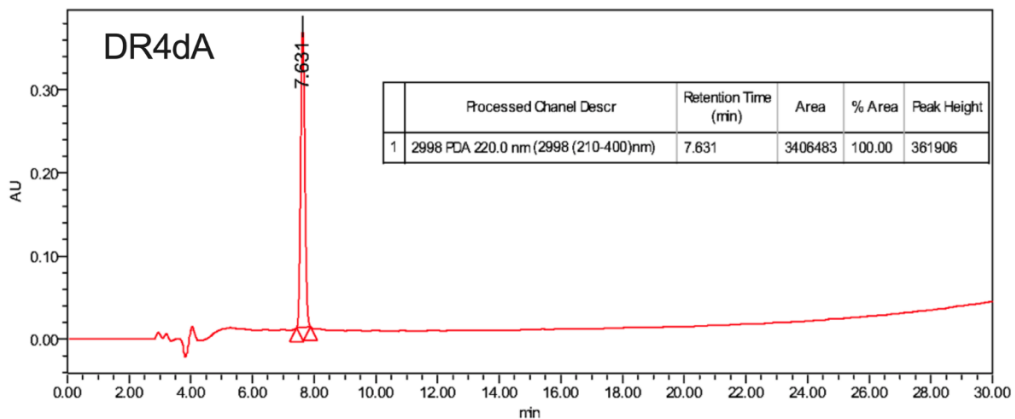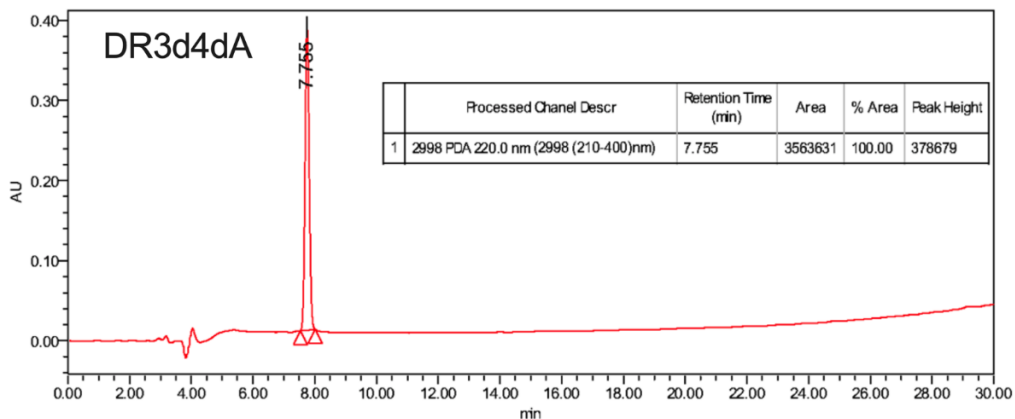

Figure S13 (continued):

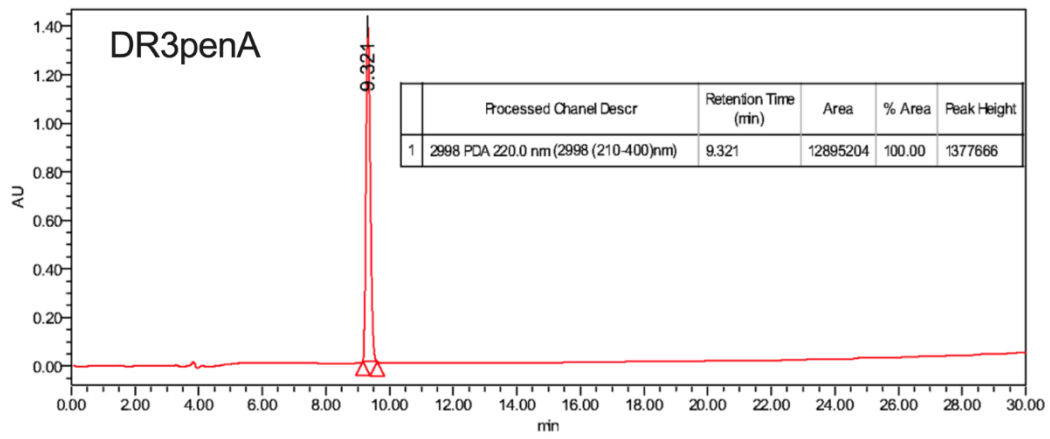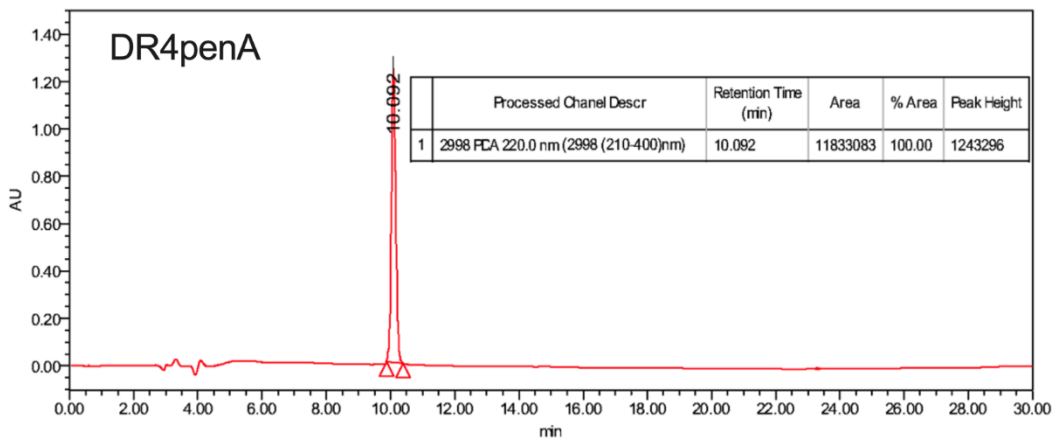

**Figure S13** Purification of peptide DR8 and DR8 analogs with RP-HPLC.

**Table S1** Body weight of mice after DR3penA administration (Mean  $\pm$  SD,  $n = 5$ ).

| Day | Mice   | Weight (g)       |                        |                        |                         |                         |
|-----|--------|------------------|------------------------|------------------------|-------------------------|-------------------------|
|     |        | PBS              | DR3penA<br>(0.5 mg/kg) | DR3penA<br>(2.5 mg/kg) | DR3penA<br>(12.5 mg/kg) | DR3penA<br>(62.5 mg/kg) |
| 0   | Female | 25.33 $\pm$ 1.72 | 24.79 $\pm$ 1.68       | 24.87 $\pm$ 1.26       | 25.17 $\pm$ 1.08        | 25.27 $\pm$ 1.09        |
|     | Male   | 27.64 $\pm$ 1.90 | 26.76 $\pm$ 1.49       | 27.37 $\pm$ 1.19       | 27.51 $\pm$ 1.29        | 27.77 $\pm$ 1.60        |
| 1   | Female | 28.29 $\pm$ 1.97 | 27.63 $\pm$ 1.53       | 27.89 $\pm$ 1.12       | 27.05 $\pm$ 2.10        | 26.83 $\pm$ 1.32        |
|     | Male   | 31.69 $\pm$ 1.97 | 30.03 $\pm$ 0.97       | 31.03 $\pm$ 1.78       | 32.18 $\pm$ 1.44        | 31.11 $\pm$ 1.82        |
| 3   | Female | 30.96 $\pm$ 2.15 | 30.23 $\pm$ 1.70       | 30.89 $\pm$ 0.91       | 29.77 $\pm$ 2.36        | 30.15 $\pm$ 2.03        |
|     | Male   | 34.98 $\pm$ 2.18 | 33.14 $\pm$ 1.43       | 33.07 $\pm$ 1.79       | 34.78 $\pm$ 2.15        | 34.57 $\pm$ 1.81        |
| 5   | Female | 33.37 $\pm$ 2.48 | 32.35 $\pm$ 1.66       | 33.24 $\pm$ 1.01       | 32.54 $\pm$ 3.57        | 32.28 $\pm$ 2.31        |
|     | Male   | 40.09 $\pm$ 2.79 | 35.37 $\pm$ 1.22**     | 38.01 $\pm$ 2.87       | 38.82 $\pm$ 2.59        | 36.94 $\pm$ 2.02        |
| 7   | Female | 33.53 $\pm$ 2.14 | 32.97 $\pm$ 2.41       | 33.90 $\pm$ 2.00       | 32.65 $\pm$ 3.80        | 32.61 $\pm$ 2.67        |
|     | Male   | 38.77 $\pm$ 2.82 | 36.35 $\pm$ 1.66       | 37.22 $\pm$ 2.79       | 37.00 $\pm$ 2.98        | 37.37 $\pm$ 1.56        |
| 9   | Female | 33.38 $\pm$ 2.13 | 31.73 $\pm$ 1.47       | 34.01 $\pm$ 1.74       | 32.72 $\pm$ 3.64        | 33.02 $\pm$ 2.88        |
|     | Male   | 39.17 $\pm$ 2.67 | 37.50 $\pm$ 1.37       | 39.08 $\pm$ 2.62       | 40.53 $\pm$ 2.79        | 39.13 $\pm$ 1.46        |
| 11  | Female | 34.04 $\pm$ 2.53 | 32.98 $\pm$ 2.78       | 34.45 $\pm$ 1.76       | 33.71 $\pm$ 3.66        | 34.72 $\pm$ 2.53        |
|     | Male   | 41.43 $\pm$ 2.52 | 38.35 $\pm$ 1.26       | 40.53 $\pm$ 2.86       | 41.05 $\pm$ 3.28        | 40.87 $\pm$ 2.11        |
| 13  | Female | 35.78 $\pm$ 2.84 | 34.26 $\pm$ 2.33       | 35.99 $\pm$ 2.86       | 35.51 $\pm$ 3.60        | 35.39 $\pm$ 3.33        |
|     | Male   | 42.79 $\pm$ 2.78 | 39.15 $\pm$ 1.11*      | 42.54 $\pm$ 3.12       | 43.87 $\pm$ 3.61        | 42.50 $\pm$ 2.35        |

\* $P < 0.05$ , \*\* $P < 0.01$  vs. the PBS control group.

**Table S2** Body weight of mice after DR8 administration (mean  $\pm$  SD,  $n = 5$ ).

| Day | Mice   | Weight (g)       |                    |                    |                     |                     |
|-----|--------|------------------|--------------------|--------------------|---------------------|---------------------|
|     |        | PBS              | DR8<br>(0.5 mg/kg) | DR8<br>(2.5 mg/kg) | DR8<br>(12.5 mg/kg) | DR8<br>(62.5 mg/kg) |
| 0   | Female | 25.33 $\pm$ 1.72 | 24.72 $\pm$ 1.79   | 24.96 $\pm$ 1.21   | 25.10 $\pm$ 1.10    | 25.39 $\pm$ 1.11    |
|     | Male   | 27.64 $\pm$ 1.90 | 26.80 $\pm$ 1.52   | 27.20 $\pm$ 1.12   | 27.52 $\pm$ 1.24    | 27.82 $\pm$ 1.57    |
| 1   | Female | 28.29 $\pm$ 1.97 | 26.51 $\pm$ 1.96   | 26.49 $\pm$ 1.95   | 28.10 $\pm$ 2.17    | 28.28 $\pm$ 1.07    |
|     | Male   | 31.69 $\pm$ 1.97 | 31.03 $\pm$ 1.60   | 30.73 $\pm$ 1.07   | 31.33 $\pm$ 1.18    | 31.33 $\pm$ 2.22    |
| 3   | Female | 30.96 $\pm$ 2.15 | 29.21 $\pm$ 2.52   | 29.03 $\pm$ 1.58   | 31.19 $\pm$ 1.89    | 30.96 $\pm$ 0.71    |
|     | Male   | 34.98 $\pm$ 2.18 | 33.46 $\pm$ 2.48   | 33.58 $\pm$ 1.46   | 33.60 $\pm$ 1.67    | 34.22 $\pm$ 2.55    |
| 5   | Female | 33.37 $\pm$ 2.48 | 31.51 $\pm$ 2.55   | 30.78 $\pm$ 1.97   | 34.10 $\pm$ 1.82    | 33.75 $\pm$ 2.44    |
|     | Male   | 40.09 $\pm$ 2.79 | 38.79 $\pm$ 3.07   | 37.63 $\pm$ 1.79   | 37.40 $\pm$ 1.98    | 38.12 $\pm$ 3.58    |
| 7   | Female | 33.53 $\pm$ 2.14 | 30.97 $\pm$ 3.07   | 31.52 $\pm$ 1.72   | 33.68 $\pm$ 1.53    | 33.99 $\pm$ 1.74    |
|     | Male   | 38.77 $\pm$ 2.82 | 36.06 $\pm$ 3.05   | 37.24 $\pm$ 1.87   | 36.87 $\pm$ 1.83    | 38.03 $\pm$ 2.97    |
| 9   | Female | 33.38 $\pm$ 2.13 | 32.22 $\pm$ 2.84   | 31.45 $\pm$ 1.78   | 34.27 $\pm$ 1.14    | 33.93 $\pm$ 2.58    |
|     | Male   | 39.17 $\pm$ 2.67 | 39.65 $\pm$ 2.84   | 37.95 $\pm$ 1.50   | 38.70 $\pm$ 2.10    | 39.24 $\pm$ 3.40    |
| 11  | Female | 34.04 $\pm$ 2.53 | 33.08 $\pm$ 3.13   | 31.98 $\pm$ 1.90   | 35.51 $\pm$ 1.40    | 34.63 $\pm$ 2.02    |
|     | Male   | 41.43 $\pm$ 2.52 | 40.83 $\pm$ 2.87   | 39.19 $\pm$ 2.01   | 39.51 $\pm$ 2.53    | 41.30 $\pm$ 3.68    |
| 13  | Female | 35.78 $\pm$ 2.84 | 34.22 $\pm$ 2.48   | 33.45 $\pm$ 2.30   | 37.45 $\pm$ 1.96    | 35.89 $\pm$ 3.06    |
|     | Male   | 42.79 $\pm$ 2.78 | 43.66 $\pm$ 2.81   | 41.12 $\pm$ 2.40   | 41.82 $\pm$ 2.83    | 42.53 $\pm$ 4.34    |

**Table S3** Antibodies used for western blotting, immunohistochemistry and immunofluorescence.

| Antibodies                                     | Species | WB       | IHC   | IF    | Source                    |
|------------------------------------------------|---------|----------|-------|-------|---------------------------|
| $\alpha$ -SMA                                  | Rabbit  | 1:500    |       |       | Abcam                     |
| E-cadherin                                     | Rabbit  | 1:1000   |       |       | Servicebio                |
| E-cadherin                                     | Mouse   |          |       | 1:200 | Abcam                     |
| Vimentin                                       | Rabbit  | 1:1000   |       | 1:200 | Cell Signaling Technology |
| Collagen I                                     | Rabbit  | 1:1000   |       |       | Cell Signaling Technology |
| Collagen I                                     | Rabbit  | 1:1000   | 1:500 | 1:100 | Servicebio                |
| Fibronectin                                    | Rabbit  | 1:1000   | 1:200 |       | Abcam                     |
| MMP2                                           | Rabbit  | 1:500    |       |       | Servicebio                |
| TGF- $\beta$ 1                                 | Rabbit  | 1:1000   |       |       | Abcam                     |
| AQP5                                           | Rabbit  | 1:1000   |       |       | Proteintech               |
| pERK                                           | Rabbit  | 1:1000   |       |       | Cell Signaling Technology |
| p-p38                                          | Rabbit  | 1:1000   |       |       | Cell Signaling Technology |
| pSmad2/3                                       | Rabbit  | 1:1000   |       |       | Cell Signaling Technology |
| pAKT                                           | Rabbit  | 1:1000   |       |       | Cell Signaling Technology |
| ERK                                            | Rabbit  | 1:1000   |       |       | Beyotime                  |
| p38                                            | Rabbit  | 1:1000   |       |       | Cell Signaling Technology |
| Smad2/3                                        | Rabbit  | 1:1000   |       |       | Cell Signaling Technology |
| AKT                                            | Rabbit  | 1:1000   |       |       | Cell Signaling Technology |
| GAPDH                                          | Rabbit  | 1:5000   |       |       | Proteintech               |
| HRP-conjugated IgG                             | Goat    | 1:10,000 |       |       | ImmunoWay                 |
| CoraLite594-conjugated<br>Goat Anti-Rabbit IgG | Goat    |          |       | 1:200 | Proteintech               |
| CoraLite488-conjugated<br>Goat Anti-Mouse IgG  | Goat    |          |       | 1:200 | Proteintech               |



**Table S4** Primer pairs used for quantitative real-time PCR.

| Gene          | Forward primer (5'–3')  | Reverse primer (5'–3')  |
|---------------|-------------------------|-------------------------|
| Human         |                         |                         |
| <i>ACTA2</i>  | ACTGCCTTGGTGTGTGACAA    | CACCATCACCCCCTGATGTC    |
| <i>VIM</i>    | AGGCAAAGCAGGAGTCCACTGA  | ATCTGGCGTTCCAGGGACTCAT  |
| <i>CDH1</i>   | CTTCTGCTGATCCTGTCTGATG  | TGCTGTGAAGGGAGATGTATTG  |
| <i>FN1</i>    | ACAACACCGAGGTGACTGAGAC  | GGACACAACGATGCTTCCTGAG  |
| <i>COL1A1</i> | GTGCGATGACGTGATCTGTGA   | CGGTGGTTTTCTTGGTTCGGT   |
| <i>MMP2</i>   | GATACCCCTTTGACGGTAAGGA  | CCTTCTCCCAAGGTCCATAGC   |
| <i>ABCA1</i>  | AGCTGTTCACCGACAATAAG    | CCACCAAGTCCCAAGATAA     |
| <i>NKD1</i>   | AGACACGCTCAGCGAGGAA     | TGCCGTTGTTGTCAAAGTCATA  |
| <i>CMTM4</i>  | TTCAATCGTACTGGCTGCTTT   | CCAGGAATGTGTTCACTGCATA  |
| <i>GPX3</i>   | CATTCGGTCTGGTCATTCTGG   | GGTCGGACATACTTGAGGGTA   |
| <i>MTMR4</i>  | GGACTCCAAAGTGGTGAGGTG   | ACCAGGCATGGTAGGCAAAG    |
| <i>AQP5</i>   | GCCATCCTTTACTTCTACCTGC  | CTCCTCCCAGTCCTCGTCA     |
| <i>STK38</i>  | TCAGCACATGCTCGGAAGG     | ACAAGCCGTACCTCACCAAAT   |
| <i>SIRT5</i>  | GTCCACACGAAACCAGATTTGCC | TCCTCTGAAGGTCGGAACACCA  |
| <i>GAPDH</i>  | GTCTCCTCTGACTTCAACAGCG  | ACCACCCTGTTGCTGTAGCCAA  |
| Mouse         |                         |                         |
| <i>Acta2</i>  | ACTGGGACGACATGGAAAAG    | CATCTCCAGAGTCCAGCACA    |
| <i>Col1a1</i> | GCTCCTCTTAGGGGCCACT     | CCACGTCTCACCATTGGGG     |
| <i>Vim</i>    | CGTCCACACGCACCTACAG     | GGGGGATGAGGAATAGAGGCT   |
| <i>Cdh1</i>   | CAGGTCTCCTCATGGCTTTGC   | CTTCCGAAAAGAAGGCTGTCC   |
| <i>Mmp2</i>   | CAAGTTCCCCGGCGATGTC     | TTCTGGTCAAGGTCACCTGTC   |
| <i>Fn1</i>    | ATGTGGACCCCTCCTGATAGT   | GCCCAGTGATTTCAAGCAAAGG  |
| <i>Sod1</i>   | AACCAGTTGTGTTGTCAGGAC   | CCACCATGTTTCTTAGAGTGAGG |
| <i>Sod2</i>   | CAGACCTGCCTTACGACTATGG  | CTCGGTGGCGTTGAGATTGTT   |
| <i>Cat</i>    | AGCGACCAGATGAAGCAGTG    | TCCGCTCTCTGTCAAAGTGTG   |
| <i>Nox1</i>   | GGTTGGGGCTGAACATTTTTC   | TCGACACACAGGAATCAGGAT   |
| <i>Nox4</i>   | GAAGGGGTAAACACCTCTGC    | ATGCTCTGCTTAAACACAATCCT |
| <i>Gapdh</i>  | AGGAGTAAGAAACCCTGGAC    | CTGGGATGGAATTGTGAG      |

**Table S5** Globally harmonized classification system.

| Acute toxicity level | LD50 (mg/kg BW) |
|----------------------|-----------------|
| I                    | 0.5–5           |
| II                   | 5–50            |
| III                  | 50–300          |
| IV                   | 300–2000        |
| V                    | 2000–5000       |
| Unclassified         | > 5000          |

## **Supplemental Materials and Methods**

### **Cell cytotoxicity assay**

MTT assays were used to assess the cytotoxicity of NIH3T3 and A549 cells. NIH3T3 cells plated in 96-well plates were treated with DR8 analogs at different concentrations (0, 10, 20, 40, 80 and 160  $\mu\text{mol/L}$ ) for 24 h when cells reached a confluence of 80%. A549 cells were treated with DR3penA at the indicated concentrations for 48 h. Then, 10  $\mu\text{L}$  of MTT (5 mg/mL, Sigma–Aldrich) was incubated with cells for 4 h, and 150  $\mu\text{L}$  of DMSO was used to dissolve the formazan crystals after the supernatant in the wells was discarded. The absorbance at 570 nm was detected with a multimode microplate reader (MD, CA, USA). The formula used to calculate cell viability was as follows: cell viability (%) =  $(A_{\text{treated}} - A_{\text{blank}}) / (A_{\text{control}} - A_{\text{blank}}) \times 100$ .

DR8 analogs were diluted in serum-free medium at concentrations of 10, 20, 40, 80 and 160  $\mu\text{mol/L}$  to measure toxic effects. NIH3T3 cells were incubated for 24 h, and A549 cells were incubated for 48 h.

### **Lung injury in mice after DR3penA treatment**

Female C57BL/6 mice were randomly divided into 2 groups ( $n = 8$  per group): (1) normal control group (normal); (2) DR3penA (2.5 mg/kg) group. Mice in the normal group and DR3penA group were subcutaneously injected with PBS or DR3penA (2.5 mg/kg) every day for 21 days, respectively. Mice were sacrificed on the 22nd day, and blood and lung tissue samples were collected for follow-up studies.

### **Dual-luciferase reporter assay**

293T cells were cultured in 24-well plates at  $1 \times 10^5$  cells/well, and cotransfected with miR-23b and AQP5-3'UTR wild-type (WT) or AQP5-3'UTR mutant (Mut) plasmids for 48 h. The cells were lysed with Passive Lysis Buffer at 4 °C for 20 min. Luciferase activity was measured with a Dual-Luciferase® Reporter Assay System (Promega, Madison, WI, USA). After quantification of the firefly luciferase fluorescence intensity of, 20  $\mu\text{L}$  of Stop & Glo® Reagent was added to each well to terminate the reaction, and then, the Renilla luciferase activity was detected using a microplate reader.

### **Quantitative detection of intracellular ROS using DCFH-DA**

The intracellular ROS levels in NIH3T3 cells and A549 cells were detected using the fluorescent probe DCFH-DA (Sigma–Aldrich). Cells were plated in the black 96 well plates for 24 h. After starvation with serum-free medium overnight, the cells were treated with TGF- $\beta$ 1 alone or with DR8 or DR3penA for 12 h. Then, 10  $\mu$ mol/L DCFH-DA dissolved in DMSO and diluted with serum-free medium was added to the cells for 30 min at 37 °C. The fluorescence intensity of DCFH-DA was detected with a multimode microplate reader after washing away the DCFH-DA that failed to enter the cells with PBS. The fluorescence excitation and emission wavelengths were 488 nm and 525 nm, respectively.
